# Supplementary material
Source: ML conference proceedings conference paper supplement (https://proceedings.neurips.cc/paper_files/paper/2019/hash/16fc18d787294ad5171100e33d05d4e2-Abstract.html)
Supplement: Supplementary file 1 [file 16fc18d787294ad5171100e33d05d4e2-Supplemental.zip]

## 8 Supplementary Material

### 8.1 Additional visualisation results

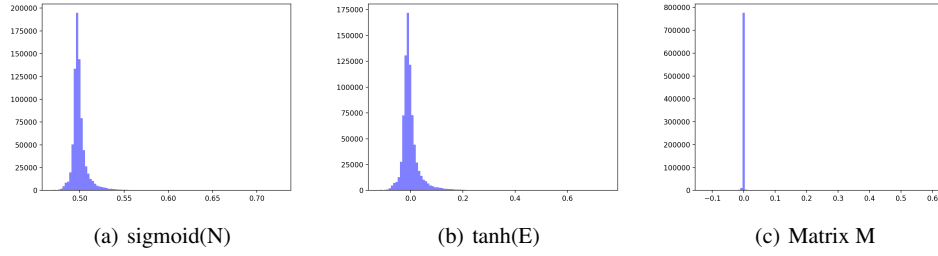

Figure 3: Visualization at  $d = 200$  on SearchQA dataset.

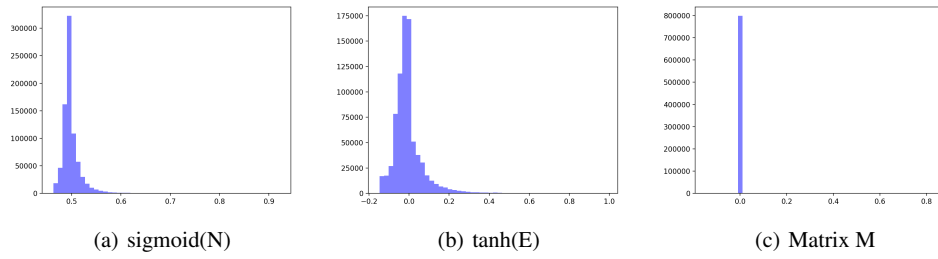

Figure 4: Visualization at  $d = 200$  on Quasar-T dataset.
