# Supplementary material
Source: ML conference proceedings conference paper supplement (https://proceedings.neurips.cc/paper_files/paper/2019/hash/16fc18d787294ad5171100e33d05d4e2-Abstract.html)
Supplement: Supplementary file 2 [file 16fc18d787294ad5171100e33d05d4e2-Supplemental.zip]

Archive with 1 entries (1 files):
- NeurIPS_2019_CODA_CRC_B 5.08.15 PM.pdf
